# Supplementary material for: Soil Aggregate Stability of Forest Islands and Adjacent Ecosystems in West Africa
Source: Copernicus journal article supplement (doi:10.5194/soil-2019-87), 2020-01-08
Supplement: Supplementary file [file soil-2019-87-AC1-supplement.pdf]

Before any response, We would like to thanks editorial board and the reviewer for the valuable and relevant comment.

Comment 1 « However, there are critical details missing from the methods section, the motivation for the study should be elaborated on, and the implications of this study must be added. Finally, while the authors suggest that the soil properties they evaluate in this study may lead to the development of forest patches (lines 22-23; lines 231-232), it seems more likely that changes in soil properties are the result of human establishment of forest patches (lines 22, 45). I suggest that the authors re-phrase and state that their study focuses on the effects of the development of patches with relatively luxuriant vegetation on soil aggregation.

In response to your comments on the lines 22-23; lines 231-232, we

We have now changed our sentence and state that “To better understand the effects on soil quality of the development of these patches with relatively luxuriant vegetation, our study focused on the effect on soil aggregation of forest islands, nearby areas and natural savanna vegetation across a precipitation transect in West Africa”.....

Specific line comments are as follows:

Line 31 « The implications of this study should be highlighted at the end of the discussion.

We addressed this by ending the discussion with the following:

Soil organic carbon and iron oxides contents as the most important factors influencing aggregate stability in West African ecosystems. By increasing soil structural stability, forest island contributes to soil erosion reduction and the control of land degradation.

« The introduction is short, but comprehensive. However, given that the authors find that soil mineralogy, climate, and agricultural disturbance are more important drivers of soil aggregation than vegetation per se, I suggest elaborating on the two sentences found in lines 38-42. The reader would benefit from more background information on these factors driving aggregate formation and develop the tension between physical and chemical drivers vs. biological drivers of aggregate formation. Additionally, the potential importance of these factors for different aggregate fractions should be described. »

We agreed with this point and we took it into account in the revised version by adding the following:

Tillage mixes the soil surface layers and exposes soil aggregates to wet–dry cycles (Roose, 1981; Beare et al., 1994; Ouattara, 1994; Whalen et al., 2003). Organic matter turnover is thereby increased and then weakened aggregates stability (Hadas, 1990). In the absence of tillage, the addition of compost can increase macroaggregation and rhizospheric aggregate stability (Whalen et al., 2003; Bronick & Lal, 2005). Gicheru et al. (2004) ; AHMAD et al, (2014) reported more stable soil aggregates in conservation agriculture system (minimum or no-tillage) compared to conventional tillage.

Ouattara et al., (2008) found positive correlation between microaggregate stability and soil base cation contents in Luvisol, whereas this correlation was negative in Lixisol, indicating a difference in chemical bonding mechanisms between the two soils. Soil organic matter is a main element in the cohesion and hydrophobicity of soil aggregates, thereby sensitivity to slaking of soil, depending on the soil intrinsic physico-chemical components (Igwe and al, 2009). Thus, persistent soil organic matter (humified, or recalcitrant) is key in microaggregates (53-250  $\mu\text{m}$ ) water stability, labile organic matter and microorganisms (transient, temporary) sustain water stable macroaggregates (> 250 $\mu\text{m}$ ) making the later more vulnerable to agricultural management. There is a threshold of organic carbon above /beyond which additional input do not result to further increases in soil aggregate water stability (Amzeketa, 1999; Rillig 2004). Hydrous oxides, characteristic agent especially in microaggregate stabilization in weathered soil and aggregates of clay-size particles are associated to well-crystallized Fe oxides and poorly crystallized (Oxalate-extractable Fe) were most strongly active of coarse soil mineral particle. Ouattara et al., (2017) showed that the inorganic soil constituents, clay and iron oxyhydroxides in their amorphous form were controlling respectively 53 % ( $P < 0.001$ ) and 40 % ( $P < 0.001$ ) the soil aggregation under fields and fallow lands.

« Line 78 This method is not used to “obtain each aggregate class,” but rather, to assess aggregate stability in the different classes. »

The sentence as formulated in the manuscript need to be reworded in appropriated term.

Read « To obtain each aggregate class stability, 3 g of soil sample previously moistened by spraying with distilled water was placed, accordingly, on sieves .....»

« Lines 83-90 It is not clear to me why or how the sand fraction was determined for the stable aggregates from each size class. Currently, the methods suggest aggregate classes were separated by dry sieving and stability of these different fractions were determined by wet sieving. This all makes perfect sense to me. However, as it currently reads, it sounds like these stable fractions were then subjected to particle size distribution analyses (%sand, silt, and clay) and afterwards, these solutions were sieved through a 0.5 mm sieve. For the meso and micro aggregates (all <0.5mm), nothing should remain on the sieve. Why would only the sand content be relevant for only the stable aggregate pool and not the whole pool of soil in a given size fraction? And how would this method work for the smaller aggregate pools?

Thank you for underlining this point, and the reviewer understanding is correct. Nevertheless, the sand content is relevant for the whole pool of soil in a given size fraction. The difference in sand content can be a source of error when comparing the aggregate stability of different treatments because sand is always stable to water sieving. The determination of sand content is used to correct the result for better appreciation of the aggregates stability.

Line 95 Please describe the aluminum analyses. What are the different aluminum and iron fraction indicative of?

The description of aluminum analyses is taken into account and integrated in the chemical analysis .

Different aluminum and iron fraction have specific active role in aggregates stabilization. According to particle size, Fe crystallized and poorly crystallized amorphous forms (Oxalate-extractable Fe), well-crystallized Fe oxides plays in stabilization of coarse soil mineral particles and aggregation of clay-size particles respectively.

« Line 99 Describe how the R2 values (in Table 2) were derived from the mixed linear models. How were the P-values derived in Table 3? What were the post-hoc tests used to evaluate drivers of differences among the land use types? How were statistically different distinctions made using these statistics? For instance, in the results, the authors state that precipitation and depth were the only significant variables for microaggregate stability, while land use, but not precipitation, was an important predictor for macro and meso aggregate stability. How was this determined? Describe how the statistics in Table 4 were derived.»

From generalized linear mixed-effects models Shinichi Nakagawa and Holger Schielzeth (2010; 2013), have derived two easily interpretable values of R2. The first is called the marginal R2m and describes the proportion of variance explained by the fixed factor(s) alone. The second is the conditional R2c, which describes the proportion of variance explained by both the fixed and random factors.

In Table 3 the P values derived from the ANOVA table using land use as factor. Means comparison was made using the test of Newman-Keuls

In figure 2a the slopes of the fitted lines are sharp, indicating an increase of stable microaggregates as the precipitation increase (climate more and more wet). The three fitted lines related to the land uses are overlapping, indicating that there is not differences in microaggregates stability between land uses. For mesoaggregates (Figure 2b) and macroaggregates (Figure 2c) the fitted lines are separated indicating differences between land use. But the slopes of the lines are not sharp, indicating low influence of rainfall increase.

Table 4 derived from Kendall's correlation. It is like Pearson correlation but it is used when data are not normally distributed.

«Line 101 Here and throughout the manuscript, be careful about using the phrase “aggregate fractions.” To me, aggregate fractions refer to the relative proportions of aggregates in different size classes derived from dry sieving. I believe what the authors are referring to are the relative aggregate stability in each dry fraction. Be clear that the factors affecting aggregate stability in the different fractions are the focus.»

This is addressed using when appropriate “aggregate size fractions”

« Line 102 Why did aggregate fraction need to be arcsin and log transformed? »

The transformation was done because the data were not normally distributed

Line 128 Delete the word “of.”

It is done.

«Line 174 What implications do these results have for erosion? This was a major motivation in the introduction, but not mentioned in the discussion. Additionally, why did different parameters drive stability of the different aggregate fractions? This should be explicitly addressed in the discussion.»

It is right. The abundance of soil water stable aggregates may prevent the susceptibility of the ecosystem to erodibility.

Because of the hierarchical ordering of aggregates and their binding agents, microaggregate stability is higher and less dependent on agricultural management than macroaggregate stability (Lado et al., 2004; Six et al., 2004). Macroaggregation depends on temporary binding agents (fine roots, fungi hyphae, labile organic matter, etc.) and is considered to be sensitive to the changes in organic matter levels caused by ploughing. In contrast, microaggregates depends on strong binding agents (clay charges, colloids, ions , persistent organic matter, etc.) then show relatively high stability in response to physical disruption (Tisdall & Oades, 1982, Ouattara et al., 2008).

Lines 181-186 It's not clear how this phenomena might enhance microaggregate stability. It might increase relative microaggregate abundance, but this parameter is not evaluated in this manuscript. Line 189-191 Organic matter concentrations can both enhance and be enhanced by macroaggregates. This duality should be addressed in the discussion.

Alright, It increase relative microaggregate abundance. Also, right that soil aggregates can protect organic matter from rapid decomposition.

Lines 229-230 Only for macro and meso aggregates, respectively.
